# Supplementary material for: Evaluating the Utility of Sentinel-1 in a Data Assimilation System for Estimating Snow Depth in a Mountainous Basin
Source: Copernicus journal article supplement (doi:10.5194/egusphere-2025-978), 2025-03-21
Supplement: Supplementary file [file egusphere-2025-978-AC3-supplement.pdf]

**General comment #1:**

In this work the authors develop an independent validation of the snow depth S1-based products, and study their ability to update a snow model in a basin with high data availability using DA. The paper is generally well written and structured, and is a good contribution to the available literature.

**Author's Reply:**

We thank the reviewer for their thoughtful and constructive comments and for recognizing the contribution of this work to the snow data assimilation literature. Below, we respond to each of the key points raised:

**General comment #2:**

The authors conclude that these snow depth products have a limited ability to update numerical models. Despite this, there does appear to be a signal in the products, albeit a very noisy one. Given the results, I generally agree with the authors, although probably with more sophisticated error models (perhaps with dynamic error models), there could be some potential in this product. The work would benefit from including in the discussion the possibility in the future of improving the quantification of the uncertainty of the observations, a critical point in DA and too often overlooked.

**Author's Reply:**

We understand that more sophisticated treatment of observation error, particularly dynamic error models, might improve the utility of this dataset in data assimilation. To address this, in our existing work, we tested several uncertainty values ranging from 10cm to 90cm and found the uncertainty values that correspond to RMSE of SNOTEL, the most reliable one. However, to account for dynamic error change, we plan to test a dynamic error approach (e.g., Particle Filter), in contrast to the constant error used in our current Particle Batch Smoother implementation. If this approach leads to significantly different results, we will revise our assimilation framework accordingly. If not, we will include the comparison in the supplementary material to demonstrate that our conclusions are independent of the choice of assimilation method.

**General comment #3:**

I have been surprised by the decision to assimilate SDD. I agree that it probably performs similarly to the more standard FSCA. Although I see some problems in areas with ephemeral snowpack, where several “seasons” may occur. Perhaps the reason is to facilitate manipulation of the data by reducing multiple observations to a single observation, but I would like to know if

there is another motivation, and that the discussion reflects this possible source of uncertainty in the ephemeral snowpack areas.

**Author's Reply:**

We appreciate the reviewer's curiosity about our decision to use SDD. Our main motivation was to understand whether Sentinel-1 provides new information beyond what is already provided by commonly available remote sensing (in this case, MODIS SDD). Additionally, we recognize the potential for optical snow cover mapping to complement the Sentinel-1 data (as in Gascoin et al., 2024), which is only available through April 28 and therefore provides no information about snowpack evolution during the melt season. Moreover, Sentinel-1 has known limitations during ablation due to signal degradation in wet snow conditions. Assimilating SDD allows us to incorporate end-of-season information about snowpack disappearance timing, which provides an important constraint on model performance during the melt period. We will revise the discussion to clarify this rationale and also acknowledge the potential limitations of SDD in areas with ephemeral snowpacks, where multiple melt-refreeze cycles may complicate interpretation.

**General comment #4:**

From the DA point of view, the posterior simulations are treated as deterministic ones, while the posterior is a distribution. There are ensemble validation metrics such as the CRPS that are designed to account for the uncertainty of the posterior ensemble. Also, the authors compare the posterior runs among themselves, but it is important to compare with the reference run. Is the error after assimilating S1 equal to that of the reference (not DA), is it even worse? For example, if the error assigned to the observations is high, the prior ensemble will not be constrained at all after analysis (which is not necessarily negative, it would indicate that the observations are noisier than the uncertainty associated with the forcing). These are important questions to be discussed.

**Author's Reply:**

We agree that the posterior ensemble should be treated probabilistically and that metrics such as the Continuous Ranked Probability Score (CRPS) are valuable for assessing the full distribution of the posterior. In the current version of the manuscript, we focused on posterior means for simplicity, but we will expand our validation to include ensemble-aware metrics such as CRPS. This will better reflect the uncertainty in the posterior and improve the interpretation of the assimilation results.

We conducted internal comparisons between assimilation runs and the reference (no DA) run, and found that assimilation generally resulted in slight improvements. To maintain a focused evaluation on the utility of Sentinel-1 relative to high-accuracy observational benchmarks, we

did not include these results in the main text. However, in response to the reviewer's comment, we will include model (prior) performance in the supplementary material and reference it in the captions and discussion of Figures 5, 6, 7, and 10, as well as Tables 3, 4, and 5. This will allow readers to assess the added value (or lack thereof) of assimilation relative to the open-loop model.

### **Specific Comments:**

1.15 - Ensemble-based? all models can be run in ensembles. Maybe physically based?

**Author's Reply:** We will remove ensemble-based and replace it with physically based.

1.47- Maybe include <https://doi.org/10.1029/2021WR030271> for a recent example of spaceborne photogrammetry and DA

**Author's Reply:** We will add recent citations

1.65 - In my opinion, the biggest challenge of S1-based snow depth data is the accuracy of the product itself as proved by the recent independent validations.

**Author's Reply:** We agree with the reviewer.

1.71 - P.Broxton, remove P

**Author's Reply:** We will remove P

1.76 - The authors are running 1D DA experiments, I would remove spatiotemporal since it may be confusing. Any case, S1 DA has been tested before, showing little improvement as in authors work (eg, <https://doi.org/10.1029/2023WR035019>)

**Author's Reply:** We agree and will remove "spatiotemporal" for clarity.

1.100 - It shouldn't be a problem to DA S1 data even during melting, if a proper error model is developed.

**Author's reply:** We will test other error models and present results to understand the performance dependence on the model as detailed in our response to the other reviewer. Specifically, we will conduct a test with varying observational errors as informed by the SNOTEL evaluation.

1.146 - This is the right citation for ERA5 Land <https://doi.org/10.24381/cds.e2161bac>

**Author's reply:** We will correct the citation

l.148 - ERA5 land is available since 1950

Author's reply: We will correct the year.

l.151 - It is true that if sufficient information is provided, DA can be used as a downscaling tool. And it's a smart approach to avoid computational cost since one ensemble could potentially be used for many cells (for non-iterative schemes). But I am not convinced that this is the case for S1, according to the results. I would recommend adding something in the discussion about this, since the reference run (simulation without DA) will be very biased due to the complex topography.

Author's Reply: We agree and will add clarification in the discussion. Our results show that Sentinel-1 assimilation does not significantly improve performance compared to the model-only simulation. This suggests that the main limitation is not the lack of downscaling, but rather the reliability of the Sentinel-1 observations themselves. We will highlight this point and emphasize that, in complex terrain, observation uncertainty may dominate over any benefits from downscaling via DA.

l.154 - Is there any reason to choose PBS over other methods? PBS acronym not introduced yet

Author's Reply: We will introduce the acronym in the revised text. Following the approach of Alonso-Gonzalez et al. 2022 (MuSA), we adopted a Particle Batch Smoother over a standard Particle Filter to better leverage sparse and noisy snow observations from Sentinel-1. The batch smoother provides more robust estimates by incorporating information from the entire assimilation window, which is particularly beneficial in complex terrain where sequential filtering may fail due to observation sparsity and particle degeneracy. Additionally, the PBS is well-suited as a downscaling tool (see your previous comment).

l.175 - ... *it is well established for guiding model*... reference needed.

Author's reply: We will add a reference, e.g., (Bishay et al., 2023; Guan et al., 2013)

l.227 - FSM2 "more complex" parameterization uses a Monin-Obukhov stability adjustment

Author's Reply: We will add it in the text.

Table 1. What are the parameters of the lognormal distribution?

For the lognormal distribution, we limit the range to 0–5 to keep values realistic and avoid extreme outliers. For example, a quantile of 0.9 yields a value around 4.2, representing a large but still physically plausible uncertainty.

eq.1 - Why the conditional operator  $Z|Y$  is repeated (not repeated in the caption)? Similar comment for  $p_V(V)$ .

Author's reply: This is standard notation in **probability density functions (PDFs)**, especially in Bayesian statistics. It should read in the caption that we will edit it.

$p_{Y|Z}(Y|Z)$

- $p_{Y|Z}$ : The name of the PDF: "the probability density function of  $Y$  given  $Z$ "
- $(Y|Z)$ : The value where the function is evaluated

So, it reads:

"Evaluate the conditional probability density of  $Y$  given  $Z$  at the value  $Y$  (conditional on  $Z$ )"

l.284 & eq.286 - I am not sure about what you mean here. eq 1 is compatible with multiple observations of different nature. The number of observations of each quantity should not be a problem if the error is properly modeled. Also, should not be the joint likelihood the product (rather than the sum) of the independent likelihoods? Or were you referring to the log-likelihood, where summation (of log terms) is equivalent to multiplying the likelihoods?

Author's Reply: Under the assumption of independence, the joint likelihood should be the product of the individual likelihoods, and in log space, this becomes a sum. Our approach uses the log-likelihood formulation, where we compute the joint likelihood as the average of the log-likelihoods from  $H_s$  and  $SDD$ . We will clarify this in the method or experiment section.

Section 4.1 - I miss a visual map comparison between ASO and S1, please include it.

Author's reply: We will add visual maps of ASO and S1 comparison on nearby dates.

l.301- Please consider to include a metric that uses the posterior uncertainty, eg Continuous ranked probability score (CRPS)

Author's reply: Thank you for the suggestion. We will compute the additional metrics and consider replacing them with MAE if the CPRS metric provides more meaningful insight. Otherwise, we will include CPRS in the supplementary material for interested readers. To maintain clarity, we aim to limit the number of evaluation metrics presented in the main text.

Table2 - You can not use  $R^2$  for validation comparing timeseries (observed vs modeled) of variables that exhibit seasonality like the snowpack. The seasonal pattern forces  $R$  to be high (no snow in summer, some snow in winter). This is probably the reason why you are getting high  $R^2$  temporally, but low  $R^2$  spatially when comparing S1 against lidar. Also, if you're including

summers or long periods without snow, the RMSE, and maybe other metrics, will be of course low. Please clarify/improve the validation strategy.

Author's Reply: We appreciate the reviewer's concern regarding the use of  $R^2$  for time series of snowpack variables, which indeed can be inflated by seasonal patterns. To avoid this issue, our temporal validation strategy specifically focuses on periods when observed and modeled snow depth data are both available and non-missing. We calculate  $R^2$ , RMSE, MAE, and bias only for dates within the snow season (October 1 to September 30) where overlapping measurements exist. This ensures that metrics are not biased by long periods of snow absence, such as during summer.

Additionally, our spatial validation (e.g., S1 vs. lidar) is computed on individual dates and therefore not subject to seasonal inflation. We will clarify these details in the revised Methods section to better explain the validation strategy and ensure the robustness of the reported metrics.

1.319 - Please provide the value here for the S1 uncertainty estimation

Author's Reply: We will add a value.

Fig5 - In legend, Particle? Is that grey shadow the ensemble standard deviation? maybe call it open loop or prior ensemble? What about the posterior spread? The inclusion of the posterior dispersion of the experiments probably makes the figure too complicated, but there is no mention of posterior uncertainty anywhere in the paper.

Author's Reply: We will call it prior ensembles and add posterior spread. Originally, it was removed to avoid confusion in the figure.

Table3 (and maybe other places as well) - Same comment as for Table2

Author's Reply: Same reply as on Table 2

Table4 - Control experiments? they are not there (despite they should)

Author's Reply: It was a typo and will be removed. Control/no DA runs will be added in the supplement.

Figure7 - Please include the reference run and observations for comparison. c) How are they combined? This is not very standard

Author's Reply : To keep focus on comparing Sentinel-1 with higher accuracy data, we removed model runs, however, we will include model runs in the supplement and refer to them in the main text.

Table5. Consider to add Hs-F even if repeated, its annoying to scroll up and down for comparing

Author's Reply: We will add.

Figure10 c) please review caption *Panel c shows the density plot comparing two experiments (Hs-F, SDD-Hs-F, and SDD)*. Similar comment as for Fig7c.

Author's Reply: We will check and correct accordingly.

1.434 - This is very speculative. If the poor spatial validation metric is because of the timing of the lidar, shouldn't the DA of the early season perform better?

Author's reply: We agree that the statement was speculative; however, our goal was not to definitively attribute the poor spatial validation to the timing of the lidar flight, but to acknowledge that it could be one of several contributing factors. While it is plausible that early-season data assimilation could perform better if aligned more closely with the lidar acquisition, we currently lack sufficient lidar acquisitions at different times to robustly test this hypothesis. We will reword the sentence to reflect this uncertainty more appropriately.

1.449 For DA, it is not a real problem to use noisy observations, as far as you know that they are noisy. I would reformulate this sentence to highlight the importance of developing more sophisticated error models (which involves a proper understanding of the S1 signal, something that should be better investigated).

Author's Reply: In our investigation, we did not observe a consistent year-to-year pattern in the errors, which currently limits our ability to construct sophisticated correction or error models. However, we agree that a better understanding of the Sentinel-1 signal and its uncertainties is essential and needs further investigation. We will add this to our discussion.

1.470 Missing parenthesis

Author's Reply: We will correct it.

1.476 Maybe include <https://doi.org/10.5194/tc-18-5753-2024>

Author's Reply: We will include the citation.

1.489 According to your results, why are the biases near and after maximum peak SWE? Since DA of Hs-F performs better than Hs-E, someone might argue otherwise.

Author's Reply: Our initial motivation for the experiment was based on our temporal error analysis results that early-season bias is typically lower, and therefore, assimilation using early-

season snow depth (Hs-E) would lead to lower overall errors. However, our results revealed that even within this seemingly reliable window, Sentinel-1-derived snow depth is not reliable enough to consistently improve SWE estimates. Additionally, in basins like the East River Basin substantial snowfall often occurs after January, limiting the predictive value of early-season observations for peak and late-season SWE (e.g., April onward). We will clarify this rationale in the revised manuscript.
